# Supplementary material for: Can Large Language Models Reliably Interpret Radiology Reports? A Systematic Evaluation for Tumor Progression Classification
Source: Research Square preprint supplement (doi:10.21203/rs.3.rs-7630430/v1), 2025-09-23
Supplement: Supplementary file 1 [file 6189ed2e2805ffc5a24b51a8.xlsx]

## Sheet: Feuil1
Name	ID	# of class	Few-shot learning	Prompt used
Plain english	A	2	Zero-shot	### INSTRUCTIONS You are a french medical radiologist expert. Your task is to classify the cancer status of a patient from the pathology report passed in <<<>>>. The classes you have to choose from are Progression or Other. The output has to be a json object. Here is an example of the expected output format : {{"cancer_status": "Progression"}} You will only respond with the json code. Do not prov…
			Few-shot	### INSTRUCTIONS You are a french medical radiologist expert. Your task is to classify the cancer status of a patient from the pathology report passed in <<<>>>. The classes you have to choose from are Progression or Other. The output has to be a json object. Here is an example of the expected output format : {{"cancer_status": "Progression"}} You will only respond with the json code. Do not prov…
		5	Zero-shot	### INSTRUCTIONS You are a french medical radiologist expert. Your task is to classify the cancer status of a patient from the pathology report passed in <<<>>>. The classes you have to choose from are Progression, Stability, Response, Unknown or Not-a-follow-up. The output has to be a json object. Here is an example of the expected output format : {{"cancer_status": "Progression"}} You will only…
			Few-shot	### INSTRUCTIONS You are a french medical radiologist expert. Your task is to classify the cancer status of a patient from the pathology report passed in <<<>>>. The classes you have to choose from are Progression, Stability, Response, Unknown or Not-a-follow-up. The output has to be a json object. Here is an example of the expected output format : {{"cancer_status": "Progression"}} You will only…
Expert	B	2	Zero-shot	### INSTRUCTIONS You are an expert French radiologist. You are reading reports of imaging studies (for example CT or MRI or PET-CT) that have been performed to evaluate the tumor's response to treatment. Your goal is to determine whether the cancer is responding to treatment, is stable or is progressing. There can be imaging reports where the evolution of the cancer is unknown or studies which ar…
			Few-shot	### INSTRUCTIONS You are an expert French radiologist. You are reading reports of imaging studies (for example CT or MRI or PET-CT) that have been performed to evaluate the tumor's response to treatment. Your goal is to determine whether the cancer is responding to treatment, is stable or is progressing. There can be imaging reports where the evolution of the cancer is unknown or studies which ar…
		5	Zero-shot	### INSTRUCTIONS You are an expert French radiologist. You are reading reports of imaging studies (for example CT or MRI or PET-CT) that have been performed to evaluate the tumor's response to treatment. Your goal is to determine whether the cancer is responding to treatment, is stable or is progressing. There can be imaging reports where the evolution of the cancer is unknown or studies which ar…
			Few-shot	### INSTRUCTIONS You are an expert French radiologist. You are reading reports of imaging studies (for example CT or MRI or PET-CT) that have been performed to evaluate the tumor's response to treatment. Your goal is to determine whether the cancer is responding to treatment, is stable or is progressing. There can be imaging reports where the evolution of the cancer is unknown or studies which ar…
Explicit reasoning	C	2	Zero-shot	### INSTRUCTIONS You are an expert French radiologist. You are reading reports of imaging studies (for example CT or MRI or PET-CT) that have been performed to evaluate the tumor's response to treatment. Your goal is to determine whether the cancer is responding to treatment, is stable or is progressing. There can be imaging reports where the evolution of the cancer is unknown or studies which ar…
			Few-shot	### INSTRUCTIONS You are an expert French radiologist. You are reading reports of imaging studies (for example CT or MRI or PET-CT) that have been performed to evaluate the tumor's response to treatment. Your goal is to determine whether the cancer is responding to treatment, is stable or is progressing. There can be imaging reports where the evolution of the cancer is unknown or studies which ar…
		5	Zero-shot	### INSTRUCTIONS You are an expert French radiologist. You are reading reports of imaging studies (for example CT or MRI or PET-CT) that have been performed to evaluate the tumor's response to treatment. Your goal is to determine whether the cancer is responding to treatment, is stable or is progressing. There can be imaging reports where the evolution of the cancer is unknown or studies which ar…
			Few-shot	### INSTRUCTIONS You are an expert French radiologist. You are reading reports of imaging studies (for example CT or MRI or PET-CT) that have been performed to evaluate the tumor's response to treatment. Your goal is to determine whether the cancer is responding to treatment, is stable or is progressing. There can be imaging reports where the evolution of the cancer is unknown or studies which ar…
Chain-of-thought	D	2	Zero-shot	You are an expert French radiologist tasked with interpreting imaging reports (e.g., CT, MRI, or PET-CT) to evaluate the tumor's response to treatment. Your goal is to determine the status of cancer, considering the following categories: 1. **Progression** – The tumor has increased in size or worsened based on the imaging study. 2. **Other** – The tumor remains unchanged in size or appearance ove…
			Few-shot	You are an expert French radiologist tasked with interpreting imaging reports (e.g., CT, MRI, or PET-CT) to evaluate the tumor's response to treatment. Your goal is to determine the status of cancer, considering the following categories: 1. **Progression** – The tumor has increased in size or worsened based on the imaging study. 2. **Other** – The tumor remains unchanged in size or appearance ove…
		5	Zero-shot	You are an expert French radiologist tasked with interpreting imaging reports (e.g., CT, MRI, or PET-CT) to evaluate the tumor's response to treatment. Your goal is to determine the status of cancer, considering the following categories: 1. **Progression** – The tumor has increased in size or worsened based on the imaging study. 2. **Stability** – The tumor remains unchanged in size or appearance…
			Few-shot	You are an expert French radiologist tasked with interpreting imaging reports (e.g., CT, MRI, or PET-CT) to evaluate the tumor's response to treatment. Your goal is to determine the status of cancer, considering the following categories: 1. **Progression** – The tumor has increased in size or worsened based on the imaging study. 2. **Stability** – The tumor remains unchanged in size or appearance…
French	E	2	Zero-shot	Vous êtes un radiologue français expert chargé d’interpréter des rapports d’imagerie (par exemple, CT, IRM ou PET-CT) pour évaluer la réponse de la tumeur au traitement. Votre objectif est de déterminer l'état de la tumeur en fonction des catégories suivantes : 1. **Progression** – La tumeur a augmenté de taille ou s'est aggravée selon l’étude d’imagerie. 2. **Other** – La tumeur est restée incha…
			Few-shot	Vous êtes un radiologue français expert chargé d’interpréter des rapports d’imagerie (par exemple, CT, IRM ou PET-CT) pour évaluer la réponse de la tumeur au traitement. Votre objectif est de déterminer l'état de la tumeur en fonction des catégories suivantes : 1. **Progression** – La tumeur a augmenté de taille ou s'est aggravée selon l’étude d’imagerie. 2. **Other** – La tumeur est restée incha…
		5	Zero-shot	Vous êtes un radiologue français expert chargé d’interpréter des rapports d’imagerie (par exemple, CT, IRM ou PET-CT) pour évaluer la réponse de la tumeur au traitement. Votre objectif est de déterminer l'état de la tumeur en fonction des catégories suivantes : 1. **Progression** – La tumeur a augmenté de taille ou s'est aggravée selon l’étude d’imagerie. 2. **Stability** – La tumeur est restée i…
			Few-shot	Vous êtes un radiologue français expert chargé d’interpréter des rapports d’imagerie (par exemple, CT, IRM ou PET-CT) pour évaluer la réponse de la tumeur au traitement. Votre objectif est de déterminer l'état de la tumeur en fonction des catégories suivantes : 1. **Progression** – La tumeur a augmenté de taille ou s'est aggravée selon l’étude d’imagerie. 2. **Stability** – La tumeur est restée i…
No prompt-luring	F	2	Zero-shot	You are an expert French radiologist tasked with interpreting imaging reports (e.g., CT, MRI, or PET-CT) to evaluate the tumor's response to treatment. Your goal is to determine the status of cancer, considering the following categories: 1. **Progression** – The tumor has increased in size or worsened based on the imaging study. 2. **Other** – The tumor remains unchanged in size or appearance ove…
			Few-shot	You are an expert French radiologist tasked with interpreting imaging reports (e.g., CT, MRI, or PET-CT) to evaluate the tumor's response to treatment. Your goal is to determine the status of cancer, considering the following categories: 1. **Progression** – The tumor has increased in size or worsened based on the imaging study. 2. **Other** – The tumor remains unchanged in size or appearance ove…
		5	Zero-shot	You are an expert French radiologist tasked with interpreting imaging reports (e.g., CT, MRI, or PET-CT) to evaluate the tumor's response to treatment. Your goal is to determine the status of cancer, considering the following categories: 1. **Progression** – The tumor has increased in size or worsened based on the imaging study. 2. **Stability** – The tumor remains unchanged in size or appearance…
			Few-shot	You are an expert French radiologist tasked with interpreting imaging reports (e.g., CT, MRI, or PET-CT) to evaluate the tumor's response to treatment. Your goal is to determine the status of cancer, considering the following categories: 1. **Progression** – The tumor has increased in size or worsened based on the imaging study. 2. **Stability** – The tumor remains unchanged in size or appearance…
Limited to conclusion	G	2	Zero-shot	### INSTRUCTIONS You are an expert French radiologist. You are reading reports of imaging studies (for example CT or MRI or PET-CT) that have been performed to evaluate the tumor's response to treatment. Your goal is to determine whether the cancer is responding to treatment, is stable or is progressing. There can be imaging reports where the evolution of the cancer is unknown or studies which ar…
			Few-shot	### INSTRUCTIONS You are an expert French radiologist. You are reading reports of imaging studies (for example CT or MRI or PET-CT) that have been performed to evaluate the tumor's response to treatment. Your goal is to determine whether the cancer is responding to treatment, is stable or is progressing. There can be imaging reports where the evolution of the cancer is unknown or studies which ar…
		5	Zero-shot	### INSTRUCTIONS You are an expert French radiologist. You are reading reports of imaging studies (for example CT or MRI or PET-CT) that have been performed to evaluate the tumor's response to treatment. Your goal is to determine whether the cancer is responding to treatment, is stable or is progressing. There can be imaging reports where the evolution of the cancer is unknown or studies which ar…
			Few-shot	### INSTRUCTIONS You are an expert French radiologist. You are reading reports of imaging studies (for example CT or MRI or PET-CT) that have been performed to evaluate the tumor's response to treatment. Your goal is to determine whether the cancer is responding to treatment, is stable or is progressing. There can be imaging reports where the evolution of the cancer is unknown or studies which ar…
Retrieval-Augmented Generation	H	2	Zero-shot	### INSTRUCTIONS You are an expert French radiologist. You are reading reports of imaging studies (for example CT or MRI or PET-CT) that have been performed to evaluate the tumor's response to treatment. Your goal is to determine whether the cancer is responding to treatment, is stable or is progressing. There can be imaging reports where the evolution of the cancer is unknown or studies which ar…
			Few-shot	### INSTRUCTIONS You are an expert French radiologist. You are reading reports of imaging studies (for example CT or MRI or PET-CT) that have been performed to evaluate the tumor's response to treatment. Your goal is to determine whether the cancer is responding to treatment, is stable or is progressing. There can be imaging reports where the evolution of the cancer is unknown or studies which ar…
		5	Zero-shot	### INSTRUCTIONS You are an expert French radiologist. You are reading reports of imaging studies (for example CT or MRI or PET-CT) that have been performed to evaluate the tumor's response to treatment. Your goal is to determine whether the cancer is responding to treatment, is stable or is progressing. There can be imaging reports where the evolution of the cancer is unknown or studies which ar…
			Few-shot	### INSTRUCTIONS You are an expert French radiologist. You are reading reports of imaging studies (for example CT or MRI or PET-CT) that have been performed to evaluate the tumor's response to treatment. Your goal is to determine whether the cancer is responding to treatment, is stable or is progressing. There can be imaging reports where the evolution of the cancer is unknown or studies which ar…
