# Supplementary material for: Can Large Language Models Reliably Interpret Radiology Reports? A Systematic Evaluation for Tumor Progression Classification
Source: Research Square preprint supplement (doi:10.21203/rs.3.rs-7630430/v1), 2025-09-23
Supplement: Supplementary file 2 [file aa062233ef06abf473a7a4f7.xlsx]

## Sheet: LLM_performances_per_configurat
llm	prompt	example	F1-score	F1-IC-	F1-IC+
DeepSeek-V2-L	A2	few-shot	0.377771	0.364164	0.39309
Llama-3.1-70B	A2	few-shot	0.658549	0.641355	0.675038
Llama-3.1-8B	A2	few-shot	0.402245	0.388449	0.415467
Llama-3.1-8B-I	A2	0-shot	0.59921	0.510204	0.672727
Llama-3.1-8B-I	A2	few-shot	0.749056	0.731354	0.766777
Llama-3.2-1B	A2	few-shot	0.0524752	0.0369105	0.0684755
Llama-3.2-1B-I	A2	few-shot	0.500204	0.47271	0.527021
Llama-3.2-3B-I	A2	few-shot	0.514454	0.498177	0.52988
Llama-3.3-70B-I	A2	0-shot	0.63658	0.552764	0.711864
Llama-3.3-70B-I	A2	few-shot	0.665614	0.648308	0.683211
Llama-3.3-70B-I-AWQ	A2	0-shot	0.646297	0.559524	0.717391
Llama-3.3-70B-I-AWQ	A2	few-shot	0.681091	0.663385	0.696665
Meditron-70B	A2	0-shot	0.360234	0.306011	0.422392
Meditron-70B	A2	few-shot	0.569142	0.489083	0.647303
Ministral-8B-I	A2	few-shot	0.643447	0.626456	0.662654
Mistral-12B-I	A2	0-shot	0.708227	0.623377	0.783505
Mistral-12B-I	A2	few-shot	0.765209	0.74878	0.780874
Mistral-24B-I	A2	0-shot	0.558113	0.48	0.632727
Mistral-24B-I	A2	few-shot	0.761369	0.68254	0.836601
Mistral-7B-I	A2	few-shot	0.584527	0.568102	0.601852
Mixtral-8x7B-I	A2	0-shot	0.621656	0.54359	0.70339
Mixtral-8x7B-I	A2	few-shot	0.677766	0.659896	0.694836
DeepSeek-V2-L	A5	few-shot	0.424964	0.409751	0.440716
Llama-3.1-70B	A5	few-shot	0.732032	0.71395	0.748797
Llama-3.1-8B	A5	few-shot	0.512625	0.495161	0.528071
Llama-3.1-8B-I	A5	0-shot	0.688523	0.609929	0.759358
Llama-3.1-8B-I	A5	few-shot	0.701787	0.683841	0.719184
Llama-3.2-1B	A5	few-shot	0.35053	0.336462	0.364246
Llama-3.2-1B-I	A5	few-shot	0.43762	0.422055	0.45448
Llama-3.2-3B-I	A5	few-shot	0.550168	0.530811	0.567216
Llama-3.3-70B-I	A5	0-shot	0.68475	0.611111	0.757282
Llama-3.3-70B-I	A5	few-shot	0.77107	0.755446	0.787739
Llama-3.3-70B-I-AWQ	A5	0-shot	0.688119	0.607143	0.757396
Llama-3.3-70B-I-AWQ	A5	few-shot	0.77331	0.756757	0.790363
Meditron-70B	A5	0-shot	0.36385	0.297521	0.431472
Meditron-70B	A5	few-shot	0.563659	0.488038	0.635983
Ministral-8B-I	A5	few-shot	0.763107	0.745891	0.778745
Mistral-12B-I	A5	0-shot	0.703745	0.614525	0.777778
Mistral-12B-I	A5	few-shot	0.781891	0.766061	0.797824
Mistral-24B-I	A5	0-shot	0.744712	0.6625	0.811111
Mistral-24B-I	A5	few-shot	0.798142	0.719424	0.863905
Mistral-7B-I	A5	few-shot	0.687182	0.667727	0.704574
Mixtral-8x7B-I	A5	0-shot	0.697469	0.61039	0.775956
Mixtral-8x7B-I	A5	few-shot	0.719368	0.701493	0.738979
Llama-3.1-8B-I	B2	0-shot	0.669009	0.634731	0.701987
Llama-3.1-8B-I	B2	few-shot	0.719966	0.685065	0.756757
Llama-3.3-70B-I	B2	0-shot	0.757802	0.722749	0.792408
Llama-3.3-70B-I	B2	few-shot	0.732215	0.698962	0.766935
Llama-3.3-70B-I-AWQ	B2	0-shot	0.780521	0.747847	0.813049
Llama-3.3-70B-I-AWQ	B2	few-shot	0.730954	0.696172	0.760532
Meditron-70B	B2	0-shot	0.366273	0.305556	0.423773
Meditron-70B	B2	few-shot	0.655468	0.571429	0.740331
Mistral-12B-I	B2	0-shot	0.701056	0.659884	0.740645
Mistral-12B-I	B2	few-shot	0.802424	0.772118	0.830808
Mistral-24B-I	B2	0-shot	0.74024	0.654545	0.811429
Mistral-24B-I	B2	few-shot	0.777744	0.705036	0.84507
Mixtral-8x7B-I	B2	0-shot	0.683993	0.650826	0.717602
Mixtral-8x7B-I	B2	few-shot	0.68037	0.646123	0.715686
Llama-3.1-8B-I	B5	0-shot	0.777383	0.744257	0.810127
Llama-3.1-8B-I	B5	few-shot	0.707827	0.66568	0.741036
Llama-3.3-70B-I	B5	0-shot	0.787388	0.755228	0.816837
Llama-3.3-70B-I	B5	few-shot	0.810018	0.776471	0.838621
Llama-3.3-70B-I-AWQ	B5	0-shot	0.796751	0.763338	0.830486
Llama-3.3-70B-I-AWQ	B5	few-shot	0.81504	0.784423	0.844125
Meditron-70B	B5	0-shot	0.42582	0.398999	0.454936
Meditron-70B	B5	few-shot	0.665874	0.630653	0.699647
Mistral-12B-I	B5	0-shot	0.748017	0.707124	0.779188
Mistral-12B-I	B5	few-shot	0.817943	0.78819	0.845758
Mistral-24B-I	B5	0-shot	0.798685	0.722892	0.868132
Mistral-24B-I	B5	few-shot	0.805218	0.731343	0.868217
Mixtral-8x7B-I	B5	0-shot	0.679291	0.643923	0.712357
Mixtral-8x7B-I	B5	few-shot	0.724361	0.687728	0.758011
Llama-3.1-8B-I	C2	0-shot	0.669832	0.637022	0.706949
Llama-3.1-8B-I	C2	few-shot	0.752781	0.718367	0.784844
Llama-3.3-70B-I	C2	0-shot	0.796592	0.764249	0.827225
Llama-3.3-70B-I	C2	few-shot	0.758203	0.726012	0.787736
Llama-3.3-70B-I-AWQ	C2	0-shot	0.817832	0.786395	0.845745
Llama-3.3-70B-I-AWQ	C2	few-shot	0.768377	0.734545	0.8
Meditron-70B	C2	0-shot	0.364679	0.30137	0.422392
Meditron-70B	C2	few-shot	0.615466	0.529412	0.694737
Mistral-12B-I	C2	0-shot	0.65589	0.618454	0.69188
Mistral-12B-I	C2	few-shot	0.763475	0.731586	0.794293
Mistral-24B-I	C2	0-shot	0.765692	0.686747	0.834225
Mistral-24B-I	C2	few-shot	0.773023	0.695035	0.839506
Mixtral-8x7B-I	C2	0-shot	0.692024	0.655844	0.72549
Mixtral-8x7B-I	C2	few-shot	0.717895	0.685832	0.747412
DeepSeek-V2-L	C5	few-shot	0.405803	0.33657	0.475309
Llama-3.1-70B	C5	few-shot	0.761673	0.68323	0.829932
Llama-3.1-8B	C5	few-shot	0.529935	0.45614	0.606061
Llama-3.1-8B-I	C5	0-shot	0.737333	0.698972	0.775885
Llama-3.1-8B-I	C5	few-shot	0.708448	0.670315	0.745257
Llama-3.2-1B	C5	few-shot	0.358869	0.298246	0.425876
Llama-3.2-1B-I	C5	few-shot	0.492687	0.408377	0.57485
Llama-3.2-3B-I	C5	few-shot	0.614681	0.526882	0.683938
Llama-3.3-70B-I	C5	0-shot	0.81207	0.776623	0.842236
Llama-3.3-70B-I	C5	few-shot	0.808881	0.777778	0.839752
Llama-3.3-70B-I-AWQ	C5	0-shot	0.821633	0.791123	0.848883
Llama-3.3-70B-I-AWQ	C5	few-shot	0.838663	0.811749	0.864583
Meditron-70B	C5	0-shot	0.367735	0.302198	0.429668
Meditron-70B	C5	few-shot	0.610683	0.533333	0.692308
Ministral-8B-I	C5	few-shot	0.783864	0.704225	0.851613
Mistral-12B-I	C5	0-shot	0.744006	0.706192	0.781973
Mistral-12B-I	C5	few-shot	0.798889	0.765799	0.82663
Mistral-24B-I	C5	0-shot	0.80763	0.735294	0.874251
Mistral-24B-I	C5	few-shot	0.788245	0.702703	0.861111
Mistral-7B-I	C5	few-shot	0.685133	0.607595	0.756098
Mixtral-8x7B-I	C5	0-shot	0.70037	0.663562	0.734234
Mixtral-8x7B-I	C5	few-shot	0.750735	0.716049	0.784452
Llama-3.1-8B-I	D2	0-shot	0.68875	0.612717	0.757396
Llama-3.1-8B-I	D2	few-shot	0.707	0.627737	0.779661
Llama-3.3-70B-I	D2	0-shot	0.798803	0.722222	0.867052
Llama-3.3-70B-I	D2	few-shot	0.759086	0.682171	0.824176
Llama-3.3-70B-I-AWQ	D2	0-shot	0.792704	0.715328	0.857143
Llama-3.3-70B-I-AWQ	D2	few-shot	0.756986	0.678571	0.827957
Meditron-70B	D2	0-shot	0.572702	0.483871	0.65285
Meditron-70B	D2	few-shot	0.574415	0.486111	0.66242
Mistral-12B-I	D2	0-shot	0.7221	0.632353	0.807229
Mistral-12B-I	D2	few-shot	0.720744	0.632353	0.788889
Mistral-24B-I	D2	0-shot	0.670848	0.568966	0.761062
Mistral-24B-I	D2	few-shot	0.752449	0.655172	0.834437
Mixtral-8x7B-I	D2	0-shot	0.777761	0.705036	0.846626
Mixtral-8x7B-I	D2	few-shot	0.719326	0.63354	0.792899
Llama-3.1-8B-I	D5	0-shot	0.62966	0.581688	0.676101
Llama-3.1-8B-I	D5	few-shot	0.658319	0.621266	0.696721
Llama-3.3-70B-I	D5	0-shot	0.77585	0.744304	0.807825
Llama-3.3-70B-I	D5	few-shot	0.801963	0.771795	0.832328
Llama-3.3-70B-I-AWQ	D5	0-shot	0.763426	0.72914	0.79405
Llama-3.3-70B-I-AWQ	D5	few-shot	0.789845	0.758344	0.820972
Meditron-70B	D5	0-shot	0.486273	0.412698	0.557621
Meditron-70B	D5	few-shot	0.460349	0.336842	0.571429
Mistral-12B-I	D5	0-shot	0.715192	0.679195	0.751515
Mistral-12B-I	D5	few-shot	0.72986	0.695535	0.767189
Mistral-24B-I	D5	0-shot	0.747297	0.657143	0.833333
Mistral-24B-I	D5	few-shot	0.75741	0.660714	0.834286
Mixtral-8x7B-I	D5	0-shot	0.759173	0.722892	0.79521
Mixtral-8x7B-I	D5	few-shot	0.727234	0.696891	0.761421
Llama-3.1-8B-I	E2	0-shot	0.660812	0.57732	0.731481
Llama-3.1-8B-I	E2	few-shot	0.612385	0.542857	0.683128
Llama-3.3-70B-I	E2	0-shot	0.802538	0.727273	0.864516
Llama-3.3-70B-I	E2	few-shot	0.783284	0.694915	0.850299
Llama-3.3-70B-I-AWQ	E2	0-shot	0.781559	0.703448	0.853659
Llama-3.3-70B-I-AWQ	E2	few-shot	0.742314	0.661538	0.820225
Meditron-70B	E2	0-shot	0.563862	0.464286	0.647059
Meditron-70B	E2	few-shot	0.519624	0.41958	0.610778
Mistral-12B-I	E2	0-shot	0.731759	0.641221	0.810127
Mistral-12B-I	E2	few-shot	0.748422	0.666667	0.81761
Mistral-24B-I	E2	0-shot	0.672605	0.568627	0.767857
Mistral-24B-I	E2	few-shot	0.694144	0.592593	0.796748
Mixtral-8x7B-I	E2	0-shot	0.756093	0.68323	0.827586
Mixtral-8x7B-I	E2	few-shot	0.679809	0.590604	0.754717
Llama-3.1-8B-I	E5	0-shot	0.715712	0.674157	0.754772
Llama-3.1-8B-I	E5	few-shot	0.685516	0.648464	0.722524
Llama-3.3-70B-I	E5	0-shot	0.756132	0.722581	0.790123
Llama-3.3-70B-I	E5	few-shot	0.77149	0.741059	0.802993
Llama-3.3-70B-I-AWQ	E5	0-shot	0.751845	0.719388	0.783455
Llama-3.3-70B-I-AWQ	E5	few-shot	0.745828	0.710145	0.780051
Meditron-70B	E5	0-shot	0.453632	0.381679	0.522648
Meditron-70B	E5	few-shot	0.59382	0.483333	0.688742
Mistral-12B-I	E5	0-shot	0.691734	0.655367	0.725664
Mistral-12B-I	E5	few-shot	0.748012	0.714116	0.778643
Mistral-24B-I	E5	0-shot	0.73647	0.646465	0.819672
Mistral-24B-I	E5	few-shot	0.755065	0.666667	0.834646
Mixtral-8x7B-I	E5	0-shot	0.727085	0.692407	0.762155
Mixtral-8x7B-I	E5	few-shot	0.704674	0.669323	0.744298
Llama-3.1-8B-I	F2	0-shot	0	0	0
Llama-3.1-8B-I	F2	few-shot	0.212768	0.102564	0.321839
Llama-3.3-70B-I	F2	0-shot	0.571389	0.466667	0.672269
Llama-3.3-70B-I	F2	few-shot	0.471999	0.346939	0.584071
Llama-3.3-70B-I-AWQ	F2	0-shot	0.575829	0.465517	0.672727
Llama-3.3-70B-I-AWQ	F2	few-shot	0.574478	0.464286	0.675497
Meditron-70B	F2	0-shot	0	0	0
Meditron-70B	F2	few-shot	0	0	0
Mistral-12B-I	F2	0-shot	0.242564	0.130435	0.358491
Mistral-12B-I	F2	few-shot	0.570741	0.461538	0.671429
Mistral-24B-I	F2	0-shot	0.474878	0.346154	0.588235
Mistral-24B-I	F2	few-shot	0.48906	0.36	0.6
Mixtral-8x7B-I	F2	0-shot	0	0	0
Mixtral-8x7B-I	F2	few-shot	0	0	0
Llama-3.1-8B-I	F5	0-shot	0.0280318	0.00574713	0.0544959
Llama-3.1-8B-I	F5	few-shot	0.290294	0.235566	0.346667
Llama-3.3-70B-I	F5	0-shot	0.538593	0.485269	0.586357
Llama-3.3-70B-I	F5	few-shot	0.547091	0.493151	0.597663
Llama-3.3-70B-I-AWQ	F5	0-shot	0.646815	0.605263	0.688103
Llama-3.3-70B-I-AWQ	F5	few-shot	0.608277	0.5625	0.652106
Meditron-70B	F5	0-shot	0	0	0
Meditron-70B	F5	few-shot	0	0	0
Mistral-12B-I	F5	0-shot	0.22842	0.176471	0.283654
Mistral-12B-I	F5	few-shot	0.599131	0.551471	0.648062
Mistral-24B-I	F5	0-shot	0.42776	0.301075	0.537634
Mistral-24B-I	F5	few-shot	0.530875	0.413043	0.648148
Mixtral-8x7B-I	F5	0-shot	0	0	0
Mixtral-8x7B-I	F5	few-shot	0	0	0
DeepSeek-V2-L	G2	0-shot	0.360202	0.297376	0.42246
DeepSeek-V2-L	G2	few-shot	0.443403	0.357895	0.525253
Llama-3.1-70B	G2	0-shot	0.53162	0.447619	0.612403
Llama-3.1-70B	G2	few-shot	0.741055	0.651852	0.8125
Llama-3.1-8B	G2	0-shot	0.49177	0.40553	0.560886
Llama-3.1-8B	G2	few-shot	0.639997	0.552147	0.72
Llama-3.1-8B-I	G2	0-shot	0.643535	0.562092	0.724832
Llama-3.1-8B-I	G2	few-shot	0.733044	0.635659	0.812903
Llama-3.2-1B	G2	0-shot	0.39346	0.326241	0.461039
Llama-3.2-1B	G2	few-shot	0.450457	0.338983	0.556522
Llama-3.2-1B-I	G2	0-shot	0.469288	0.368421	0.564417
Llama-3.2-1B-I	G2	few-shot	0.440781	0.317073	0.56
Llama-3.2-3B-I	G2	0-shot	0.571275	0.466667	0.677686
Llama-3.2-3B-I	G2	few-shot	0.577505	0.471698	0.677419
Llama-3.3-70B-I	G2	0-shot	0.781917	0.691729	0.866142
Llama-3.3-70B-I	G2	few-shot	0.768479	0.690647	0.836879
Llama-3.3-70B-I-AWQ	G2	0-shot	0.773777	0.689655	0.855172
Llama-3.3-70B-I-AWQ	G2	few-shot	0.772703	0.692913	0.847682
Meditron-70B	G2	0-shot	0.396953	0.326923	0.459215
Meditron-70B	G2	few-shot	0.623336	0.512195	0.732824
Ministral-8B-I	G2	0-shot	0.63978	0.56	0.719101
Ministral-8B-I	G2	few-shot	0.725753	0.633803	0.807339
Mistral-12B-I	G2	0-shot	0.649152	0.565217	0.727273
Mistral-12B-I	G2	few-shot	0.685376	0.606897	0.75
Mistral-24B-I	G2	0-shot	0.729552	0.645161	0.810811
Mistral-24B-I	G2	few-shot	0.73535	0.652174	0.812121
Mistral-7B-I	G2	0-shot	0.6513	0.56051	0.728205
Mistral-7B-I	G2	few-shot	0.661833	0.567164	0.745562
Mixtral-8x7B-I	G2	0-shot	0.646926	0.56	0.728261
Mixtral-8x7B-I	G2	few-shot	0.740238	0.657143	0.821429
DeepSeek-V2-L	G5	0-shot	0.420022	0.34629	0.485246
DeepSeek-V2-L	G5	few-shot	0.491314	0.403846	0.572727
Llama-3.1-70B	G5	0-shot	0.585518	0.490798	0.669811
Llama-3.1-70B	G5	few-shot	0.749219	0.666667	0.8125
Llama-3.1-8B	G5	0-shot	0.582541	0.5	0.650718
Llama-3.1-8B	G5	few-shot	0.633032	0.540541	0.721893
Llama-3.1-8B-I	G5	0-shot	0.698593	0.596154	0.785714
Llama-3.1-8B-I	G5	few-shot	0.667133	0.564516	0.753846
Llama-3.2-1B	G5	0-shot	0.37671	0.307692	0.441341
Llama-3.2-1B	G5	few-shot	0.478472	0.388626	0.555556
Llama-3.2-1B-I	G5	0-shot	0.444369	0.357143	0.53125
Llama-3.2-1B-I	G5	few-shot	0.508632	0.393443	0.614035
Llama-3.2-3B-I	G5	0-shot	0.572923	0.46	0.686275
Llama-3.2-3B-I	G5	few-shot	0.535009	0.421053	0.642857
Llama-3.3-70B-I	G5	0-shot	0.770118	0.683761	0.842105
Llama-3.3-70B-I	G5	few-shot	0.743066	0.647059	0.823529
Llama-3.3-70B-I-AWQ	G5	0-shot	0.748043	0.666667	0.815789
Llama-3.3-70B-I-AWQ	G5	few-shot	0.746923	0.671429	0.82963
Meditron-70B	G5	0-shot	0.503421	0.431034	0.580645
Meditron-70B	G5	few-shot	0.655249	0.560748	0.754386
Ministral-8B-I	G5	0-shot	0.723228	0.636364	0.809816
Ministral-8B-I	G5	few-shot	0.657222	0.554455	0.757895
Mistral-12B-I	G5	0-shot	0.641375	0.561151	0.729412
Mistral-12B-I	G5	few-shot	0.686982	0.592593	0.774194
Mistral-24B-I	G5	0-shot	0.765457	0.689655	0.838235
Mistral-24B-I	G5	few-shot	0.73473	0.644068	0.808219
Mistral-7B-I	G5	0-shot	0.676068	0.593939	0.756757
Mistral-7B-I	G5	few-shot	0.682358	0.588235	0.764331
Mixtral-8x7B-I	G5	0-shot	0.656558	0.575758	0.736318
Mixtral-8x7B-I	G5	few-shot	0.765083	0.676259	0.840237
DeepSeek-V2-L	H2	0-shot	0.362902	0.296703	0.422392
DeepSeek-V2-L	H2	few-shot	0.367179	0.3	0.43299
Llama-3.1-70B	H2	0-shot	0.372038	0.308123	0.429708
Llama-3.1-70B	H2	few-shot	0.479075	0.401709	0.561798
Llama-3.1-8B	H2	0-shot	0.363299	0.30137	0.426396
Llama-3.1-8B	H2	few-shot	0.364124	0.306849	0.422392
Llama-3.1-8B-I	H2	0-shot	0.373209	0.314286	0.432292
Llama-3.1-8B-I	H2	few-shot	0.497168	0.413462	0.562771
Llama-3.2-1B	H2	0-shot	0.360242	0.3	0.422764
Llama-3.2-1B	H2	few-shot	0	0	0
Llama-3.2-1B-I	H2	0-shot	0.367837	0.252252	0.477064
Llama-3.2-1B-I	H2	few-shot	0.202598	0.0759494	0.336449
Llama-3.2-3B-I	H2	0-shot	0.424515	0.346939	0.490566
Llama-3.2-3B-I	H2	few-shot	0.400409	0.331126	0.473846
Llama-3.3-70B-I	H2	0-shot	0.670867	0.581197	0.757396
Llama-3.3-70B-I	H2	few-shot	0.703172	0.618705	0.778378
Llama-3.3-70B-I-AWQ	H2	0-shot	0.690093	0.601504	0.771242
Llama-3.3-70B-I-AWQ	H2	few-shot	0.684112	0.597561	0.76129
Meditron-70B	H2	0-shot	0.364261	0.30137	0.434343
Meditron-70B	H2	few-shot	0.404811	0.340557	0.468571
Ministral-8B-I	H2	0-shot	0.510536	0.426778	0.594595
Ministral-8B-I	H2	few-shot	0.667519	0.577778	0.75
Mistral-12B-I	H2	0-shot	0.568571	0.489796	0.651376
Mistral-12B-I	H2	few-shot	0.566162	0.478723	0.645161
Mistral-24B-I	H2	0-shot	0.694549	0.606061	0.768362
Mistral-24B-I	H2	few-shot	0.745438	0.661654	0.821192
Mistral-7B-I	H2	0-shot	0.46893	0.395522	0.539007
Mistral-7B-I	H2	few-shot	0.463387	0.385246	0.538182
Mixtral-8x7B-I	H2	0-shot	0.597135	0.505747	0.685083
Mixtral-8x7B-I	H2	few-shot	0.629269	0.544218	0.712042
DeepSeek-V2-L	H5	0-shot	0.363426	0.302198	0.43038
DeepSeek-V2-L	H5	few-shot	0.364142	0.30137	0.426396
Llama-3.1-70B	H5	0-shot	0.426954	0.355401	0.496774
Llama-3.1-70B	H5	few-shot	0.464798	0.389105	0.536232
Llama-3.1-8B	H5	0-shot	0.362841	0.30137	0.43038
Llama-3.1-8B	H5	few-shot	0.366618	0.297521	0.429668
Llama-3.1-8B-I	H5	0-shot	0.553281	0.438095	0.661017
Llama-3.1-8B-I	H5	few-shot	0.55233	0.47191	0.623932
Llama-3.2-1B	H5	0-shot	0.321158	0.228188	0.413333
Llama-3.2-1B	H5	few-shot	0.0773688	0	0.164706
Llama-3.2-1B-I	H5	0-shot	0.428122	0.322581	0.538462
Llama-3.2-1B-I	H5	few-shot	0.425133	0.298246	0.537313
Llama-3.2-3B-I	H5	0-shot	0.522934	0.435644	0.602151
Llama-3.2-3B-I	H5	few-shot	0.376311	0.307246	0.441489
Llama-3.3-70B-I	H5	0-shot	0.744673	0.661871	0.824242
Llama-3.3-70B-I	H5	few-shot	0.707646	0.604651	0.790698
Llama-3.3-70B-I-AWQ	H5	0-shot	0.707825	0.615385	0.797203
Llama-3.3-70B-I-AWQ	H5	few-shot	0.685722	0.587156	0.768116
Meditron-70B	H5	0-shot	0.361592	0.296703	0.422392
Meditron-70B	H5	few-shot	0.395719	0.333333	0.461111
Ministral-8B-I	H5	0-shot	0.642885	0.55814	0.728324
Ministral-8B-I	H5	few-shot	0.690564	0.6	0.777778
Mistral-12B-I	H5	0-shot	0.623381	0.538462	0.711656
Mistral-12B-I	H5	few-shot	0.600209	0.517647	0.678899
Mistral-24B-I	H5	0-shot	0.69682	0.616438	0.774648
Mistral-24B-I	H5	few-shot	0.744899	0.652632	0.819444
Mistral-7B-I	H5	0-shot	0.579281	0.484211	0.66
Mistral-7B-I	H5	few-shot	0.556459	0.45977	0.643678
Mixtral-8x7B-I	H5	0-shot	0.602574	0.503497	0.687831
Mixtral-8x7B-I	H5	few-shot	0.612628	0.509434	0.70922
